# Supplementary material for: Causal Evidence for the Role of Specific GABAergic Interneuron Types in Entorhinal Recruitment of Dentate Granule Cells
Source: PubMed Central journal article supplement (PMC5103275; doi:10.1038/srep36885), 2016-11-10
Supplement: srep36885-s1.pdf [file srep36885-s1.pdf]

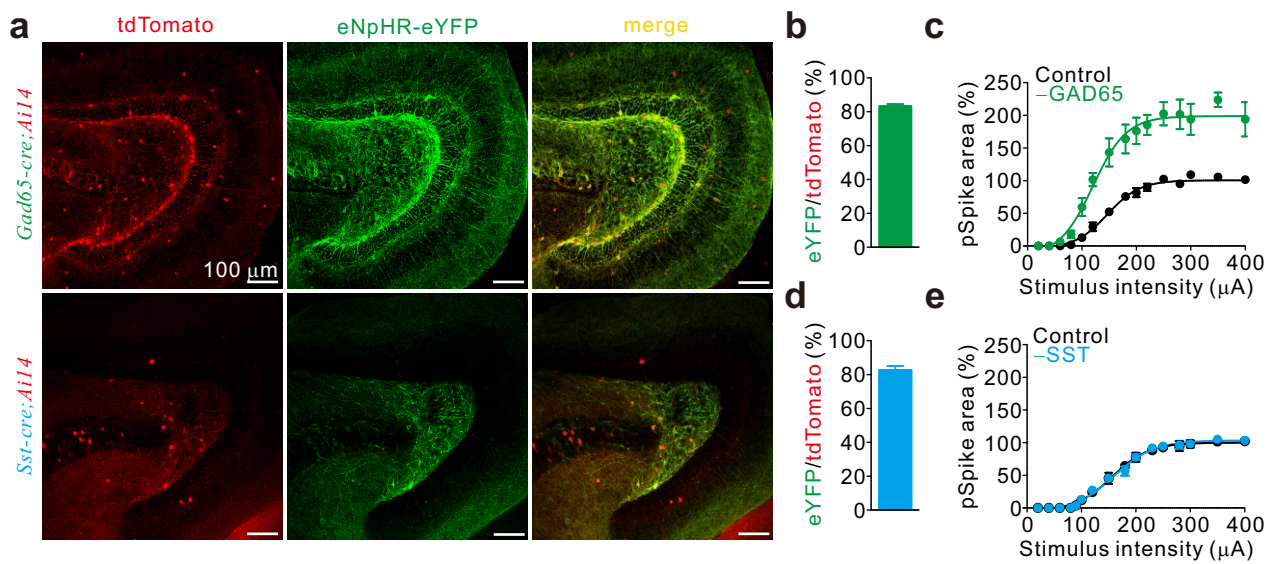

Fig.S1 Lee et al.

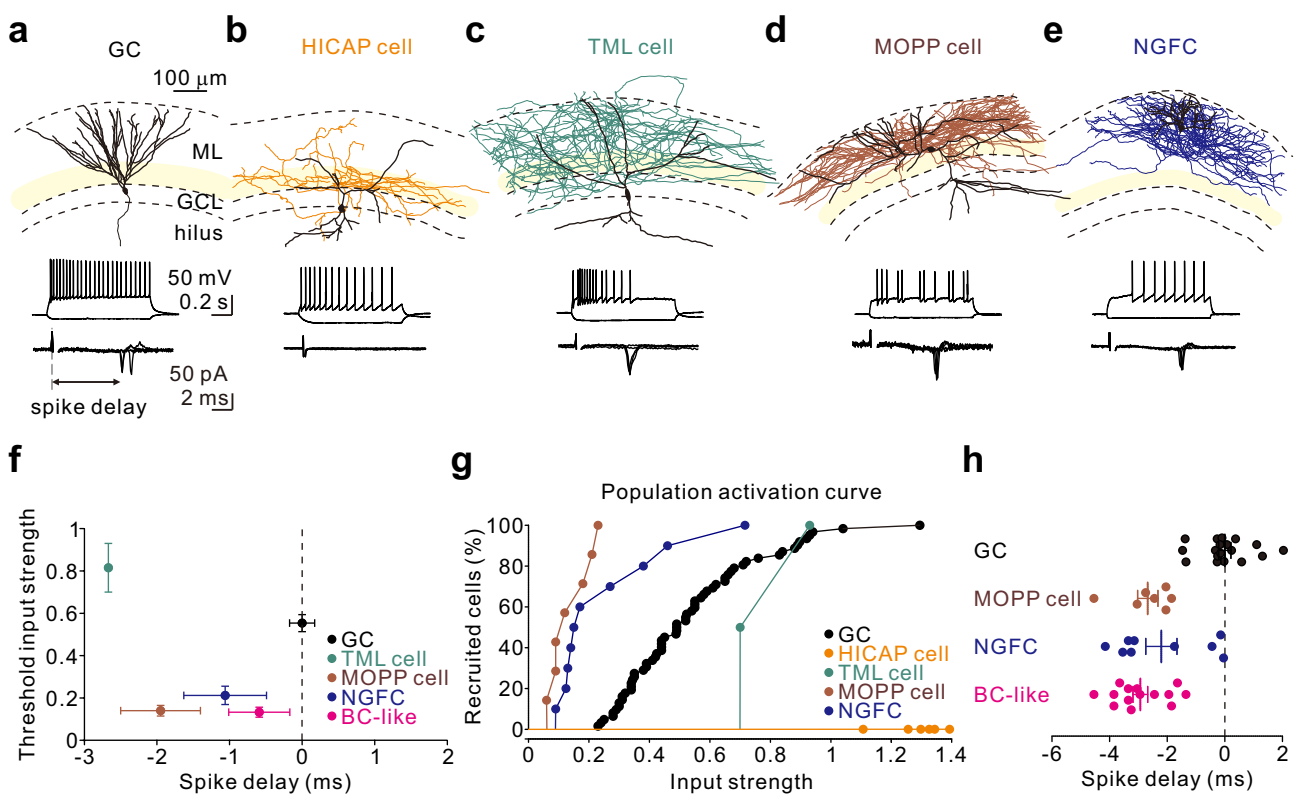

Fig.S2 Lee et al.
